# Supplementary material
Source: MDPI journal article supplement (https://www.mdpi.com/2073-4344/12/11/1333)

# Supplementary Materials

## I- Determination of catalyst leaching deduced from the calcination of the fresh catalysts and solid residues.

**Table S1:** Fresh catalysts and solid residues\* calcination at 1000°C under air in a muffle furnace: remaining weights on catalyst basis (wt%).

|                           | La <sub>2</sub> O <sub>3</sub> /ZrO <sub>2</sub> | β zeolite | NbOH   | CuZnAlO |
|---------------------------|--------------------------------------------------|-----------|--------|---------|
| Fresh catalyst            | 82.0 %                                           | 86.7 %    | 83.0 % | 82.0 %  |
| Solid residue**           | 20.3 %                                           | 35.5 %    | 6.5 %  | 3.2 %   |
| Catalysts leaching (wt %) | 75 %                                             | 59 %      | 92 %   | 96 %    |

\* recovered by filtration at the end of the reaction, assumed to content the initial catalyst amount in absence of leaching

\*\* % calculated as regards to the initial catalyst weight introduced in the reaction medium.

## II- GC-MAS analysis and calibration

**Graph S1:** Typical GC chromatogram of the Light liquid products

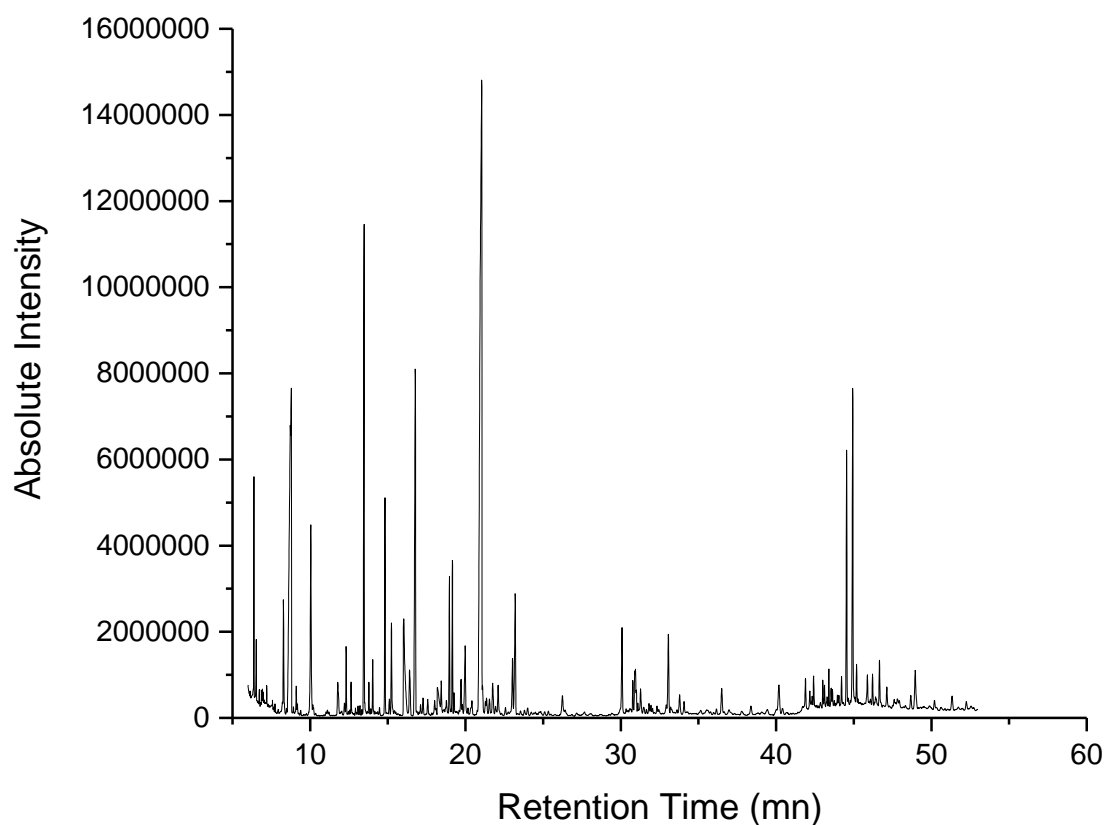

Analysis Conditions: Equipment: Shimadzu GC-MS 2010. Column NUKol (0.25 $\mu$ m, 0.25mm, and 30m). Split ratio= 50, Gas vector=He, T injector =220°C, T mass source = 200°C respectively. T program: is 5 min at 70°C, 100°C, 120°C, 150°C, 200°C using a T ramp of 20°C.min<sup>-1</sup> . Highest molecule mass ~200 g.mol<sup>-1</sup>.

**Table S2:** Table of identified products corresponding to the chromatogram shown in graph S1

| Peak | R.Time<br>(min) | Area       | Product                           | Probability |
|------|-----------------|------------|-----------------------------------|-------------|
| 1*   | 6.377           | 6481250    | Ethane, 1,2-diethoxy              | 96          |
| 2*   | 6.526           | 2500572,33 | Butane, 1,1-diethoxy-             | 95          |
| 3*   | 8.276           | 8922328,33 | Oxirane, (propoxymethyl)-         | 87          |
| 4    | 8.787           | 70233608,3 | <b>Dodecane</b>                   |             |
| 5*   | 10.040          | 18285876,3 | sec butyl ethyl ether             | 90          |
| 7    | 12.318          | 4011348,67 | Acetic acid, ethoxy-, ethyl ester | 95          |

|    |        |            |                                        |    |
|----|--------|------------|----------------------------------------|----|
| 9  | 13.472 | 31054088   | Ethyl lactate                          | 98 |
| 10 | 13.780 | 1981960    | 2-Cyclopenten-1-one                    | 94 |
| 11 | 14.028 | 3371448    | 2-Cyclopenten-1-one, 2-methyl-         | 97 |
| 12 | 14.819 | 14052925,3 | Butanoic acid, 2-hydroxy-, ethyl ester | 94 |
| 13 | 15.234 | 6974739    | Ethyl glycolate                        | 95 |
| 14 | 16.023 | 16912179,7 | Acetic acid                            | 91 |
| 15 | 16.400 | 5502207    | 2-Furaldehyde diethyl acetal           | 93 |
| 16 | 16.769 | 36166494,3 | Furfural                               | 98 |
| 17 | 17.267 | 1508109,33 | 3-Pentanone                            | 91 |
| 18 | 17.571 | 1350318,67 | 4-Heptanol                             | 88 |
| 19 |        | 4154636    | Formic acid                            | 96 |
| 20 | 18.438 | 2468362,67 | 2-Cyclopenten-1-one, 3-methyl-         | 95 |
| 21 | 18.966 | 8573186,67 | 2-Cyclopenten-1-one, 2,3-dimethyl-     | 92 |
| 22 | 19.161 | 9399690,33 | Butanoic acid, anhydride               | 94 |
| 24 | 19.713 | 2658112,67 | 3-Methyl-2-oxo-2H-pyran-6-carboxylic   | 83 |
| 25 | 19.979 | 7267542    | 3,6-Heptanedione                       | 87 |
| 26 | 21.043 | 129883935  | Ethyl levulinate                       | 94 |
| 28 | 22.102 | 2959207    | 4-Octanol, propanoate                  | 82 |
| 29 | 23.031 | 9198757    | Butanedioic acid, diethyl ester        | 82 |
| 30 | 23.203 | 12904459,7 | Butanedioic acid, diethyl ester        | 82 |
| 32 | 30.079 | 8894979,67 | 1,2-Cyclopentanedione, 3-methyl-       | 97 |
| 34 | 30.947 | 6940908    | o-guaiacol                             | 95 |
| 37 | 33.788 | 2479868,33 | p-methylguaiacol                       | 87 |
| 38 | 36.499 | 3205682,33 | 4-ethylguaiacol                        | 97 |
| 39 | 40.181 | 4728144    | p-propylguaiacol                       | 93 |
| 41 | 42.414 | 2218588    | Butanoic acid, 2-propenyl ester        | 90 |
| 42 | 43.004 | 1638159,67 | Azelaic Acid                           | 81 |
| 43 | 43.116 | 1373291,33 | 1-Hexanol, 2-ethyl-2-propyl-           | 76 |
| 44 | 43.394 | 2164093,67 | 5-Oxotetrahydrofuran-2-carboxylic acid | 94 |
| 46 | 44.539 | 18747244   | Isoeugenol                             | 86 |
| 47 | 44.936 | 25756486,3 | Acid lévulinique                       | 97 |
| 49 | 45.875 | 2461627    | Butanedioic acid, diethyl ester        | 90 |
| 50 | 46.206 | 2360277,67 | 2-Oxopentanedioic acid                 | 83 |
| 51 | 46.656 | 4031828,33 | p-propylguaiacol                       | 83 |

\*Product ascribed to ethanol conversion

### Calibration and quantitative analysis:

Dodecane is used as internal standard.

Relative coefficients with respect to dodecane were determined for the main products listed in table S3.

**Table S3:** Relative coefficients with respect to dodecane calibrated for the main products.

| Ethyl<br>format<br>e           | Hydrox<br>y<br>acetone | Ethyl<br>lactate                                                           | Furfura<br>l                       | Ethyl<br>levulinat<br>e | Furfuryliqu<br>e<br>alcohol | guaicol                                           | isoeugeno<br>l | 5-<br>HMF  |
|--------------------------------|------------------------|----------------------------------------------------------------------------|------------------------------------|-------------------------|-----------------------------|---------------------------------------------------|----------------|------------|
| 1.9705                         | 4.4452                 | 1.4017<br>(esters,<br>Ketones<br>,<br>Alcohol<br>s<br>ethers) <sup>1</sup> | 1.4343<br>(furans)<br><sup>2</sup> | 1.0671                  | 1.4907                      | 1.2714<br>(phenolic<br>compounds)<br><sup>3</sup> | 1.7040         | 1.657<br>9 |
| Acetic<br>acid                 | Formic<br>acid         |                                                                            |                                    |                         |                             |                                                   |                |            |
| 3.6370<br>(acids) <sup>4</sup> | 2.5240                 |                                                                            |                                    |                         |                             |                                                   |                |            |

<sup>1</sup>: coefficient applied to the minor products gathered in the products' families named "ester", "ketone", "alcohol", "ether"

<sup>2</sup>: coefficient applied for the minor products gathered in the products' family named "furan"

<sup>3</sup>: coefficient applied for the minor products gathered in the products' family named "phenolic compounds"

<sup>4</sup>: coefficient applied for the minor products gathered in the products' family named "acids"

## III- XRD patterns of synthesized catalysts

Figure S1: XRD Pattern of ZrO<sub>2</sub>/La<sub>2</sub>O<sub>3</sub>

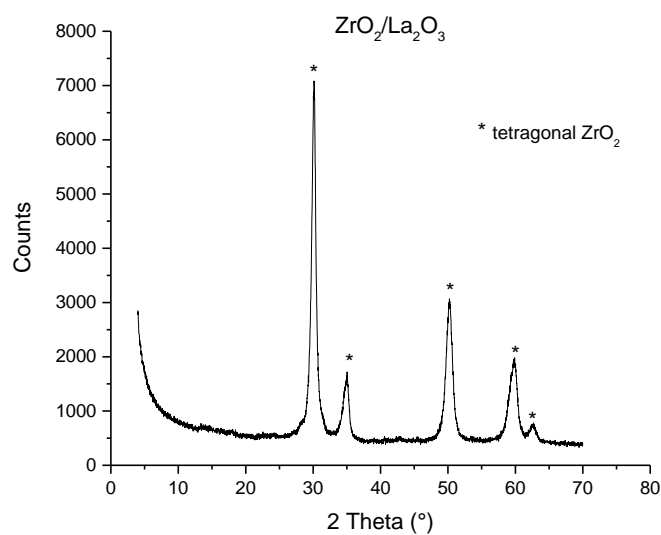

Figure S2: XRD pattern of CuZnAlO

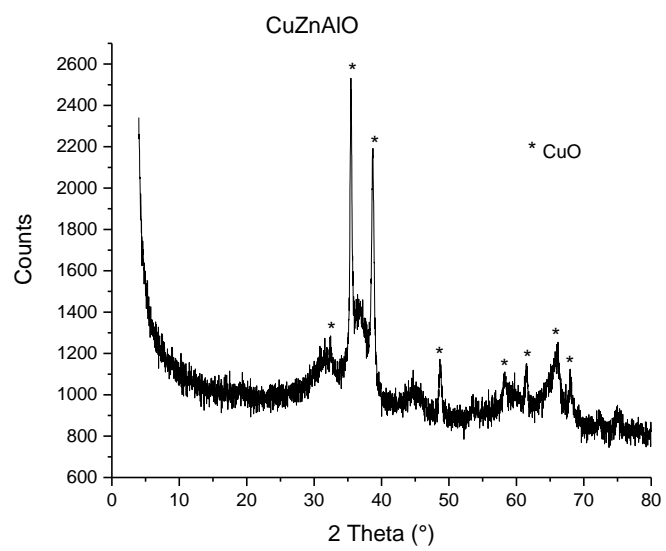

Supplement: s1 [file s1]
